# Supplementary material
Source: PubMed Central journal article supplement (PMC3785869)
Supplement: mmc1.pdf [file mmc1.pdf]

## **Spatial configuration and composition of charge modulates transport into a mucin hydrogel barrier**

Leon D. Li,<sup>†‡§</sup> Thomas Crouzier,<sup>‡</sup> Aniruddh Sarkar,<sup>§</sup> Laura Dunphy,<sup>‡</sup> Jongyoon Han,<sup>‡§</sup> and Katharina Ribbeck<sup>‡\*</sup>

<sup>†</sup>Harvard-MIT Division of Health Sciences and Technology, Cambridge, Massachusetts; and <sup>‡</sup>Departments of Biological Engineering, <sup>§</sup>Electrical Engineering and Computer Science, Massachusetts Institute of Technology, Cambridge, Massachusetts

### **Supplementary Information**

Supplementary movie 1: Fluorescence microscopy video of peptide transport into the mucin barrier and the mucin-free control channel at 20 mM NaCl ionic strength. The video is taken at 0.1 frames per second (fps) and shown at 5fps.

Supplementary movie 2: Effect of ionic strength on transport of the cationic and anionic peptides into the mucin barrier. The video is taken at 0.1 fps and shown at 5fps.

Supplementary movie 3: Effect of ionic strength on transport of the block and alternate peptides into the mucin barrier. The video is taken at 0.1 fps and shown at 5fps.
